# Supplementary material for: The silent struggle: assessing anxiety prevalence in Marrakech’s hypertensive population
Source: Springer Nature journal article supplement (doi:10.1186/s12889-025-22459-z), 2025-03-28
Supplement: MOESM1 [file 12889_2025_22459_MOESM1_ESM.pdf]

# Questionnaire of hypertensive patients

## Survey Information

Survey location: ..... Date of survey: /\_\_//\_\_ / \_\_//\_\_ / \_\_//\_\_  
Day Month Year

Interviewer ID /\_\_//\_\_ / (Initial of interviewer + initials of primary care health center)

Time of the interview: /\_\_//\_\_ / \_\_//\_\_ / Hour Minute

## Participant ID Number

/\_\_//\_\_ / \_\_//\_\_ / (patient order number + interviewer ID)

Consent form has been read to the patient : /\_\_// yes /\_\_// no

If not, read it to the patient

Consent has been obtained, orally or written form: /\_\_// yes /\_\_// non

If no, end the interview

The information collected through this document will be treated with the utmost confidentiality and will be subject to the rules of ethics relating to the respect of patient privacy and medical confidentiality.

## Demographic Information

**Gender:** Male /\_\_// Female /\_\_// **Age:** /\_\_// years **or** date of birth /\_\_//\_\_//\_\_//

**Residence Area:** Urban /\_\_// Rural /\_\_//

**Marital status:** Married /\_\_// Divorced /\_\_// Widowed /\_\_// Single /\_\_//

**Education:** Can read and write /\_\_// cannot read nor write /\_\_//

**Level of education:** Illiterate /\_\_// Primary /\_\_// Secondary /\_\_// University /\_\_//

**Occupation:** Without /\_\_// with /\_\_// if with, specify: .....

**Monthly income per household in Dhs:** ≤1500 /\_\_// ]1500-≤2000] /\_\_// ]2000- 3000] /\_\_//  
]3000-4999] /\_\_// ≥5.000 /\_\_//

**Health insurance coverage:** Mutual /\_\_// RAMEL/\_\_/ Insurance/\_\_/ Without /\_\_//

## Risk factors

**Blood pressure duration:** \_\_\_\_\_ years

| General knowledge about hypertension                   |     |    |  |
|--------------------------------------------------------|-----|----|--|
| Symptoms                                               | Yes | No |  |
| Headache                                               |     |    |  |
| Auditory whistling                                     |     |    |  |
| Blurred vision (feeling of flies in front of the eyes) |     |    |  |
| Dizziness                                              |     |    |  |
| Palpitation (fast heart rate)                          |     |    |  |
| Difficulty breathing                                   |     |    |  |

|                                                                               |            |           |                                                                                                                                                                                     |
|-------------------------------------------------------------------------------|------------|-----------|-------------------------------------------------------------------------------------------------------------------------------------------------------------------------------------|
| Epistaxis (bleeding nose)                                                     |            |           |                                                                                                                                                                                     |
| Hematuria (presence of blood in the urine)                                    |            |           |                                                                                                                                                                                     |
| Œdema                                                                         |            |           |                                                                                                                                                                                     |
| <b>Complications</b>                                                          | <b>Yes</b> | <b>No</b> |                                                                                                                                                                                     |
| Stroke                                                                        |            |           |                                                                                                                                                                                     |
| Heart attack                                                                  |            |           |                                                                                                                                                                                     |
| Kidney damage                                                                 |            |           |                                                                                                                                                                                     |
| Eye damage                                                                    |            |           |                                                                                                                                                                                     |
| <b>Prevention</b>                                                             | <b>Yes</b> | <b>No</b> |                                                                                                                                                                                     |
| Dietary and hygiene rules                                                     |            |           |                                                                                                                                                                                     |
| - loss of weight                                                              |            |           |                                                                                                                                                                                     |
| - Reduction in alcohol consumption                                            |            |           |                                                                                                                                                                                     |
| - Reduction in tobacco consumption                                            |            |           |                                                                                                                                                                                     |
| Physical activity                                                             |            |           |                                                                                                                                                                                     |
| Stress avoidance                                                              |            |           |                                                                                                                                                                                     |
| Dietary compliance                                                            |            |           |                                                                                                                                                                                     |
| Compliance with treatment                                                     |            |           |                                                                                                                                                                                     |
| Taking medication that can lead to an increase in hypertension                |            |           |                                                                                                                                                                                     |
| Self-measurement of blood pressure and regular medical (monitoring) follow-up |            |           |                                                                                                                                                                                     |
| <b>Behaviors</b>                                                              | <b>Yes</b> | <b>No</b> |                                                                                                                                                                                     |
| Tobacco                                                                       |            |           | <p>If yes, specify :</p> <p>/ __ / Current smoker</p> <p>/ __ / Former smoker</p> <p>How many years have you stopped smoking?: .....</p> <p>Number of cigarettes per day: .....</p> |
| Alcohol                                                                       |            |           | <p>If yes, specify :</p> <p>/ __ / Current drinker</p> <p>/ __ / Former Drinker</p> <p>For how many years : .....</p> <p>Quantity of glasses per day: .....</p>                     |

|                                                                                                                                                                                                                                                                                                                                                                                                                     |            |           |                                                                                                                                                                                                                                              |
|---------------------------------------------------------------------------------------------------------------------------------------------------------------------------------------------------------------------------------------------------------------------------------------------------------------------------------------------------------------------------------------------------------------------|------------|-----------|----------------------------------------------------------------------------------------------------------------------------------------------------------------------------------------------------------------------------------------------|
| Sedentarity                                                                                                                                                                                                                                                                                                                                                                                                         |            |           | How many hours the patient remains seated or lying down:<br>.....                                                                                                                                                                            |
| Physical activity<br><br>- Physical activity of more than 10 minutes duration that has resulted in increased heart rate<br><br>- Physical activity of more than 10 minutes duration in a row <b>to move from one place to another</b> , resulting in increased heart rate<br><br>- Physical activity of more than 10 minutes <b>leisurely</b> that has led to an increase in heart rate (walking, running, fitness) |            |           | If yes, how many times per week and how many hour<br><br>If yes : /__ / Low /__ / Moderate /__ / Vigorous<br>.....<br>If yes : /__ / Low /__ / Moderate /__ / Vigorous<br>.....<br>If yes : /__ / Low /__ / Moderate /__ / Vigorous<br>..... |
| NB: low refers to intensity if the activity is carried out only one day or during less than 2 hours a week, while intense if it will be carried out at least for 4 days / week or more than 7 hours /week; it will be called moderate for the rest.                                                                                                                                                                 |            |           |                                                                                                                                                                                                                                              |
| Stress                                                                                                                                                                                                                                                                                                                                                                                                              |            |           | /__ / No /__ / Moderately /__ / A lot                                                                                                                                                                                                        |
| <b>Dietary compliance</b>                                                                                                                                                                                                                                                                                                                                                                                           | <b>Yes</b> | <b>No</b> |                                                                                                                                                                                                                                              |
| -Consumption of salt                                                                                                                                                                                                                                                                                                                                                                                                |            |           | If yes : /__ / Semi salty /__ / Salty                                                                                                                                                                                                        |
| Consumption of vegetables per day                                                                                                                                                                                                                                                                                                                                                                                   |            |           | /__ / Zero vegetables /__ / one to 2 vegetables /__ / 3 to 4 vegetables /__ / 5 vegetables or more                                                                                                                                           |
| Consumption of five fruits per day                                                                                                                                                                                                                                                                                                                                                                                  |            |           | /__ / Zero fruits /__ / one to 2 fruits /__ / 3 to 4 fruits /__ / 5 fruits or more                                                                                                                                                           |
| Difficulty following the diet                                                                                                                                                                                                                                                                                                                                                                                       |            |           | Why? .....                                                                                                                                                                                                                                   |
| <b>Family history of hypertension</b>                                                                                                                                                                                                                                                                                                                                                                               |            |           | If yes : /__ / Mother /__ / Father /__ / Sister /__ / Brother /__ / Grandparent                                                                                                                                                              |
| <b>Comorbidity</b>                                                                                                                                                                                                                                                                                                                                                                                                  | <b>Yes</b> | <b>No</b> |                                                                                                                                                                                                                                              |
| - Heart disease                                                                                                                                                                                                                                                                                                                                                                                                     |            |           | If yes, type:<br>.....                                                                                                                                                                                                                       |
| - Diabetes                                                                                                                                                                                                                                                                                                                                                                                                          |            |           | If yes, type: /__ / type 1 /__ / type 2                                                                                                                                                                                                      |

|                                                                      |            |           |                                                                                                                                                              |
|----------------------------------------------------------------------|------------|-----------|--------------------------------------------------------------------------------------------------------------------------------------------------------------|
| - Dyslipidemia                                                       |            |           |                                                                                                                                                              |
| - Chronic renal failure                                              |            |           |                                                                                                                                                              |
| <b>Complication</b>                                                  |            |           | /__ / Stroke /__ / Heart damage /__ / kidney damage                                                                                                          |
| <b>Name of antihypertensive treatment</b>                            |            |           | .....                                                                                                                                                        |
|                                                                      | <b>Yes</b> | <b>No</b> |                                                                                                                                                              |
| - Monotherapy                                                        |            |           | /__ / Angiotensin II converting enzyme inhibitor /__ / thiazide diuretic beta-blocker /__ / calcium channel blocker /__ / Angiotensin II receptor antagonist |
| - Dual therapy                                                       |            |           | /__ / Angiotensin II converting enzyme inhibitor /__ / thiazide diuretic beta-blocker /__ / calcium channel blocker /__ / Angiotensin II receptor antagonist |
| - Triple therapy                                                     |            |           | /__ / Angiotensin II converting enzyme inhibitor /__ / thiazide diuretic beta-blocker /__ / calcium channel blocker /__ / Angiotensin II receptor antagonist |
| Generic drug                                                         |            |           |                                                                                                                                                              |
| <b>Duration of last treatment time in months :</b> .....             |            |           |                                                                                                                                                              |
| <b>Adherence to treatment</b>                                        |            |           |                                                                                                                                                              |
| Did you forget to take your medication this morning?                 |            |           | /__ / Yes /__ / No                                                                                                                                           |
| Have you been out of medication since the last consultation?         |            |           | /__ / Yes /__ / No. If yes : Did you:<br>/__ / buy it from the pharmacy<br>/__ / take another drug<br>/__ / remained without /__ / other                     |
| Have you had to take your treatment late compared to the usual time? |            |           | /__ / Yes /__ / No                                                                                                                                           |

|                                                                                                            |                                                                                                                         |                                                                                             |
|------------------------------------------------------------------------------------------------------------|-------------------------------------------------------------------------------------------------------------------------|---------------------------------------------------------------------------------------------|
| Have you ever missed your treatment because some days because of your memory lacking                       |                                                                                                                         | /__/ Yes /__/ No                                                                            |
| Have you ever missed treatment because some days you feel that your treatment is doing more harm than good |                                                                                                                         | /__/ Yes /__/ No                                                                            |
| Do you think you have too many pills to take?                                                              |                                                                                                                         | /__/ Yes /__/ No                                                                            |
| <b>Self-monitoring</b>                                                                                     | /__/ Yes /__/ No                                                                                                        |                                                                                             |
| Do you measure your home blood pressure?                                                                   | /__/ Yes /__/ No                                                                                                        | If no, why :<br>/__/ No instrument of measure<br><br>/__/ Other to specify : .....<br>..... |
| <b>Relationship with the care system</b>                                                                   |                                                                                                                         |                                                                                             |
| - Do you go to a <b>doctor</b> for your blood pressure ?                                                   | /__/ Yes /__/ No                                                                                                        | If yes, does it belong to the sector /__/ Public /__/ Private                               |
| - Frequency of <b>medical</b> appointments                                                                 | /__/ Once a month /__/ Every 2 months /__/ Every 3 months /__/ Every 6 months /__/ Never /__/ Just if I fell myself bad |                                                                                             |
| - What is the distance between your house and health center                                                | /__/ <6 km /__/ Between 6 and 10 km /__/ >10 Km                                                                         |                                                                                             |
| - Time taken to reach the health center                                                                    | /__/ Less than 30 min /__/ Between 30 min and 1h /__/ More than one hour                                                |                                                                                             |
| - Transportation mode                                                                                      | /__/ Walk /__/ Chariot /__/ Taxi /__/ Bus /__/ Car /__/ Bicycle                                                         |                                                                                             |
| - Availability of the drug for blood pressure                                                              | /__/ Yes /__/ No                                                                                                        |                                                                                             |
| <b>Patient doctor relationship</b>                                                                         |                                                                                                                         |                                                                                             |
| - How long does the doctor allow you during the consultation in term of time in minutes                    | .....                                                                                                                   |                                                                                             |
| Do you discuss with your doctor your personal concerns/issues about hypertension?                          | /__/ Yes /__/ No                                                                                                        |                                                                                             |
| Do you feel your doctor's desire to understand you better ?                                                | /__/ Yes /__/ No                                                                                                        |                                                                                             |
| Do you have blood pressure goals set for you ?                                                             | /__/ Yes /__/ No                                                                                                        |                                                                                             |

|                                                                                      |                                                                                        |
|--------------------------------------------------------------------------------------|----------------------------------------------------------------------------------------|
| Have you missed any follow-up appointments ?                                         | /__ / Yes /__ / No. If yes, how many times: .....                                      |
| Does someone call you when you miss your appointment ?                               | /__ / Yes /__ / No                                                                     |
| <b>Do you attend an association for hypertensive patients ?</b>                      | /__ / Yes /__ / No                                                                     |
| <b>Does your family support you in taking care of your hypertension ?</b>            | /__ / Yes /__ / No                                                                     |
| Over the last two weeks, how often have you been bothered by the following problems? |                                                                                        |
| Feeling nervous, anxious, or on edge ?                                               | /__ / Never /__ / Several days /__ / More than half the days<br>/__ / Almost every day |
| Unable to stop or control worrying?                                                  | /__ / Never /__ / Several days /__ / More than half the days<br>/__ / Almost every day |
| Worrying excessively about several things?                                           | /__ / Never /__ / Several days /__ / More than half the days<br>/__ / Almost every day |
| Having trouble relaxing?                                                             | /__ / Never /__ / Several days /__ / More than half the days<br>/__ / Almost every day |
| Being so restless that it is hard to sit still?                                      | /__ / Never /__ / Several days /__ / More than half the days<br>/__ / Almost every day |
| Getting quickly irritated or upset?                                                  | /__ / Never /__ / Several days /__ / More than half the days<br>/__ / Almost every day |
| Fearing that something terrible could occur?                                         | /__ / Never /__ / Several days /__ / More than half the days<br>/__ / Almost every day |

|          |                                                                                                                                                |
|----------|------------------------------------------------------------------------------------------------------------------------------------------------|
| Mobility | /__ / I have no difficulty going around on foot /__ / I have difficulty going around on foot /__ / I am confined to bed                        |
| Autonomy | /__ / I have no problems taking care of myself /__ / I have some problems washing or dressing myself /__ / I am unable to wash or dress myself |

|                            |                                                                                                                     |
|----------------------------|---------------------------------------------------------------------------------------------------------------------|
| Physical pain / Discomfort | /__ / I have no pain or discomfort /__ / I have moderate pain or discomfort /__ / I have extreme pain or discomfort |
|----------------------------|---------------------------------------------------------------------------------------------------------------------|

### Anthropological measurement

|                                                      | Systolic, mmHg | Diastolic, mmHg |
|------------------------------------------------------|----------------|-----------------|
| 1st measure, right arm                               |                |                 |
| 1 <sup>st</sup> measure, left arm                    |                |                 |
| 2 <sup>nd</sup> measurement at the high pressure arm |                |                 |
| 3 <sup>rd</sup> measurement at the high pressure arm |                |                 |
| <b>Mean</b>                                          |                |                 |

### Anthropological measurement

|                                         |                     |
|-----------------------------------------|---------------------|
| Weight in Kg                            |                     |
| Height in cm                            |                     |
| Hip circumference in cm                 |                     |
| Waist circumference in cm               |                     |
| Blood pressure during last three visits | ....., ....., ..... |

### Follow-up examination

ECG: /\_\_ / yes /\_\_ / no Result:

Electrolytes or ions (sodium, potassium): /\_\_ / yes /\_\_ / no Result:

Creatinine blood test: /\_\_ / yes /\_\_ / no Result:

Fasting blood glucose or glycated Hemoglobin (HbA1c): /\_\_ / yes /\_\_ / no Result:

Lipid profil: /\_\_ / yes /\_\_ / no

Total Cholesterol: /\_\_ / yes /\_\_ / no Result:

C-HDL: /\_\_ / yes /\_\_ / no Result:

C-LDL: /\_\_ / yes /\_\_ / no Result:

Triglycerides: /\_\_ / yes /\_\_ / no Result:
